# Supplementary material
Source: Springer Nature journal article supplement (https://www.springermedizin.de/resource/supplementary/12913_2008_1065_MOESM4_ESM.pdf/9536252)
Supplement: MOESM4 [file 9536252]

## Indicators:

Structural  
preconditions

1. completeness of notification form
2. coverage of registration
3. criteria or guidelines for notification
4. education and training

Diagnosis and  
notification  
process

5. completeness of registration
6. statistical methods used
7. investigation of special cases

Output:  
alert and monitor  
information

8. presentation of alert information
9. presentation of monitor information:
  - a. incidences and distribution
  - b. validity of incidence rates
  - c. additional information

Investigations or  
preventive  
measures

Reduction  
and control of  
occupational  
diseases
